# Supplementary material
Source: PubMed Central journal article supplement (PMC2662732)
Supplement: NIHMS83149-supplement-supplement.pdf [file NIHMS83149-supplement-supplement.pdf]

| Transcript     | Forward primer       | Reverse primer       |
|----------------|----------------------|----------------------|
| HRT1           | CGTCGGGATCGGATAAATAA | GCACTCTCGGAATCCTATGC |
| HRT2           | CCAGAAAAAGACGGAGAGGA | GCGCGTCAAAGTAACCTTTC |
| $\beta$ -actin | AGAAAATCTGGCACCACACC | GTCTCAAACATGATCTGGG  |
| desmin         | ATTGAATCTCTCAACGAGGA | ACACCTTCGACTTGTACCAC |
| myocardin      | AATTCCATGAGCAAAGAAAA | GGTTACCTTTTATGGCCTCT |
| SM22 $\alpha$  | AACAGCCTGTACCCTGATGG | CGGTAGTGCCCATCATTCTT |
| SM-MHC         | GCTGGAAGACACACTGGACA | CCAGGTCTGCGTTCTCTTTC |
| GATA6          | AAAAAGAGGGAATTCAAACC | CCTATGTAGAGCCCATCTTG |
| SMA-L          | CTGAGGGAAGGTCCTAACA  | AGTGCTGCCTCTTCTTCAC  |
| SMA-S          | AGCCAAGCACTGTCAGGA   | ACAATGGATGGGAAAACAG  |
| SMA-W          | TCCCTTGAGAAGAGTTACGA | CCCCTGATAGGACATTGTTA |

**Supplemental Table 1. Primers used in this study.**

|       |       | Position<br>relative to<br>start site | Strand | Core<br>Sim. | Matrix<br>Sim. | Sequence (capitals: core<br>sequence, underlined:ci-<br>value>60) |
|-------|-------|---------------------------------------|--------|--------------|----------------|-------------------------------------------------------------------|
| SMA-S | CBF-1 | -64                                   | (+)    | 1.0          | 1.0            | tt <u>TGGGA</u> gc                                                |
|       | CBF-1 | -1309                                 | (+)    | 0.842        | 0.849          | tag <u>TGAGaacct</u>                                              |
| SMA-L | HRT   | -656                                  | (-)    | 1.0          | 0.924          | ttct <u>CACG</u> agagc                                            |
|       | CBF-1 | -417                                  | (+)    | 1.0          | 0.952          | cgg <u>TGGG</u> aacga                                             |
|       | CBF-1 | +87                                   | (-)    | 1.0          | 0.887          | gtc <u>TGGG</u> aagctt                                            |
|       | HRT   | +327                                  | (-)    | 1.0          | 0.948          | gcg <u>CACG</u> cggg                                              |
|       | HRT   | +356                                  | (+)    | 1.0          | 0.965          | ccg <u>CACG</u> cgtcc                                             |

**Supplemental Table 2. Consensus CBF-1 and HRT binding sites in the SMA promoter.** Binding motif similarity scores are indicated. Perfect matches to core and matrix sequences get a score of 1.0, and hits with matrix scores lower than 0.8 are eliminated. Capital nucleotides indicate the core sequence, and the conservation index (ci) is given.
